# Supplementary material for: Distinct Roles of RNA Helicases MVH and TDRD9 in PIWI Slicing-Triggered Mammalian piRNA Biogenesis and Function
Source: PubMed Central journal article supplement (PMC5481186; doi:10.1016/j.devcel.2017.05.021), 2017-06-19
Supplement: mmc1.pdf [file mmc1.pdf]

**Developmental Cell, Volume 41**

**Supplemental Information**

**Distinct Roles of RNA Helicases MVH and TDRD9**

**in PIWI Slicing-Triggered Mammalian piRNA**

**Biogenesis and Function**

**Joanna M. Wenda, David Homolka, Zhaolin Yang, Pietro Spinelli, Ravi Sachidanandam, Radha Raman Pandey, and Ramesh S. Pillai**

## SUPPLEMENTAL FIGURE LEGENDS

### **Figure S1. MILI slicer products are present in *Mvh*<sup>-KI</sup> and *Mvh*<sup>-/-</sup> mutants, but these fail to mature into piRNAs. Related to Figure 1 and 3.**

(A) Mice carrying the artificial piRNA precursor (*Rosa26-pi*) in various *Mvh* genetic backgrounds were used for isolation of MILI complexes and preparation of deep sequencing libraries. Testes from newborn pups (P0) were used. Libraries containing short and long reads were sequenced separately (see STAR Methods). Length (in nucleotides, nt) distribution of the reporter-derived reads is compared between the various mutants. The piRNAs are almost completely absent in *Mvh*<sup>-KI</sup> and *Mvh*<sup>-/-</sup> animals. (B) Mapping of the 5' and 3' ends of the reporter-derived reads relative to the 5' end (nucleotide position -1) of the targeting MILI piRNA. Although there is an overall drastic reduction of piRNAs in the *Mvh*<sup>-KI</sup> and *Mvh*<sup>-/-</sup> mutants, the residual secondary and inchworm (or trail) piRNAs reveal similar origins.

### **Figure S2. Creation of the *Mvh* catalytic-dead knock-in mouse. Related to Figure 2.**

(A) Protein sequence alignment of Vasa orthologues from insects to human. The residues forming the ATP binding (GKT) and ATP hydrolysis (DEAD) motifs are indicated with arrowheads. Secondary structure features as present in the crystal structure of DmVasa is shown above the sequences (PDB: 2DB3). (B) Gene targeting in mouse ES cells to introduce a point mutation (E446Q) in exon 16 (indicated with red asterisk) of the *Mvh* gene locus. The targeting construct also brought in a neomycin selection cassette and *loxP* sites flanking the exon 16, for creation of the knock-out allele. The selection cassette was removed in all the experimental mice. Position of genotyping primers is shown (green arrows). (C) Southern blotting to confirm gene targeting in mouse ES cells. One of these targeted cell clones was used for mouse generation. (D) Ethidium bromide-stained gel showing the genomic PCR fragments obtained during a routine genotyping strategy using mouse tail genomic DNA. Some of the animals had both the *Mvh* allele and the *Rosa26-pi* reporter. (E) DNA sequencing tracks from one of the genotyping PCR products to show the presence of the E446Q mutation. Note that in the *Mvh*<sup>+KI</sup> genotype, contribution from both the wildtype and mutant alleles can be seen.

### **Figure S3. Analysis of MIWI2- and MILI-bound piRNAs from different *Mvh* genotypes. Related to Figure 3.**

(A) Length distributions of RNAs co-immunoprecipitated with MIWI2 from *Mvh*<sup>+/-</sup> and *Mvh*<sup>+KI</sup> P0 mouse testes. Majority of the reads refer to piRNAs (29-30 nt peak). A contaminating population of miRNAs is marked with an arrowhead (22 nt peak). (B) MIWI2-associated piRNAs (24-30 nt) were divided into “sense”, originating from annotated transcripts, and “antisense”, targeting the transcripts. Their counts were normalized to miRNA levels and compared. (C) Genome annotations of MIWI2 piRNA reveal similar distributions for *Mvh*<sup>+/-</sup> and *Mvh*<sup>+KI</sup> genotypes. (D) MILI-associated piRNAs were isolated from P0 testes and analysed by deep sequencing. Counts of MILI piRNAs produced from individual repeat classes are shown. Whereas many repeat classes display reduced piRNA levels in the *Mvh*<sup>-KI</sup> mutant, levels of L1 and Satellite piRNAs are increased. (E) Normalized counts of sense-oriented piRNAs are compared for individual repeats. (F) The graphs show the distribution of piRNAs mapped along L1 and IAPEYI consensus sequences. Coverage of targeting piRNAs is shown as negative values and coverage of sense-oriented piRNAs is displayed as positive values. While the production of sense-oriented L1 piRNAs is increased in the *Mvh*<sup>-KI</sup> mutant, likely due to transposon de-repression and increased availability of such substrates, the piRNAs targeting the IAPEYI sequence are almost absent. (G) Length distributions of RNAs immunoprecipitated with MILI from P0 testes and mapping to L1 transposon consensus sequence in antisense orientation. Majority of the reads refer to piRNAs (25-30 nt), however the full-length reads of 50



nt (50-mers) and short 16 nt reads (16-mers) are also present, and enriched in *Mvh*<sup>-KI</sup>. (H) To study whether the detected L1 antisense reads (piRNAs, 16-mers and 50-mers) are generated by piRNA guided cleavage, we compared the distances between the 5' end of targeting sense piRNAs and the 5' or 3' ends of antisense reads. The cleavage takes place in 9 nt distance from the 5' end of targeting piRNA and creates the 5' end of antisense secondary piRNA in all *Mvh* genotypes. The cleavage also defines the 5' and 3' end of the 50- and 16-mer, respectively, which are exclusively observed in *Mvh*<sup>-KI</sup>. The 16- and 50-mers therefore represent the intermediate cleavage products of endogenous slicer targets.

**Figure S4. Biogenesis of piRNAs is unaffected in the dominant-negative *Mvh*<sup>+KI</sup> mutant. Related to Figure 4.**

(A) Immunofluorescence detection of  $\gamma$ -H2AX in adult *Mvh*<sup>+KI</sup> testes. Arrows point to the XY body in spermatocytes. (B) TUNEL assay to detect double-stranded DNA breaks (green signal) in adult mouse testes of indicated genotypes. Note the increased signal in the *Mvh* mutants that display arrested spermatogenesis, and consequent infertility. (C) Western analysis of MVH in total testes lysates from adult animals of indicated genotypes. ACTIN is used as loading control. Note that the reduced MVH levels in the *Mvh*<sup>-KI</sup> mutant is due to an early arrest of spermatogenesis and loss of late-stage germ cells due to apoptosis (see below). (D) Subcellular localization of MVH, MILI and MIWI to a singular perinuclear cytoplasmic granule called the chromatoid body in purified round spermatids. These cells were isolated from adult testes of indicated genotypes. (E) Immunoprecipitation of MVH and PIWI proteins from adult mouse testes of indicated genotypes. The associated RNAs were revealed by 5' end labelling. Note the presence of piRNAs in MVH complexes isolated from the *Mvh*<sup>+KI</sup> mutant, but not seen in the control *Mvh*<sup>+/-</sup> testes. Association of piRNAs with MILI and MIWI seems not be affected. Sequence analysis also revealed unchanged composition (see Figure 4).

**Figure S5. Analysis of slicer products associating with MVH in the *Mvh* dominant-negative mutant. Related to Figure 4.**

(A) Length distributions of piRNAs immunoprecipitated with MILI and MIWI from adult mouse testes. (B) Relative proportion of individual annotation categories was compared between MVH-associated long reads (51-mers) and MVH-associated piRNAs. (C) The frequency of individual nucleotides at 1<sup>st</sup> and 10<sup>th</sup> position is shown for piRNAs bound by MILI, MIWI and MVH. There is a strong 1U-bias, a feature found in pachytene piRNAs. (D) The genomic coordinates of 5' ends of piRNAs and MVH-associated long reads (51-mers) were identified and those generating at least 0.25 rpm were considered. The percentage of the shared 5' end positions is shown for individual library comparisons (left panel). Percentage of the reads which originate from those positions in each library is shown (right panel). For example, ~70% of positions where MIWI<sup>+KI</sup> piRNAs start also give rise to MILI<sup>+/-</sup> piRNAs and ~90% of all MIWI<sup>+KI</sup> piRNAs start from these positions. (E) The plots show the 5' end distance between the piRNAs targeting the genic transcripts and the transcript-derived long reads (51-mers) that are associated with MVH. (F) The plots show the 5' end distances between the piRNAs targeting the L1\_MM transposon consensus and originating piRNAs or the the transposon-derived long reads (51-mers) that are associated with MVH.

**Figure S6. Creation of the *Tdrd9* catalytic-dead knock-in mouse. Related to Figure 5.**

(A) Gene targeting strategy for introduction of point mutation E247Q (indicated with an asterisk) in the ATPase motif (DEVH→DQVH) of the exon 5 of the *Tdrd9* locus in mouse ES cells. Introduction of *loxP* sites also allow creation of the null allele by deletion of exons 3-5. (B) Southern blot analysis of genomic DNA from targeted ES cell clones to determine successful gene targeting. (C) Genomic PCR strategy to identify mutant alleles from mouse tail genomic DNA. Sequence tracks from such PCR fragments is shown to reveal the presence of the point mutation E247Q.

**Figure S7. Analysis of spermatogenesis and transposon silencing in *Tdrd9* knock-in mice. Related to Figure 5.**

(A) Hematoxylin and eosin staining of adult mouse testes from indicated *Tdrd9* knock-in genotypes. Notice the large seminiferous tubules in the *Tdrd9*<sup>+/*KI*</sup> control, while those in the *Tdrd9*<sup>*KI/KI*</sup> mutant are small and narrow due to arrested spermatogenesis. A zoom-in view of the control testes shows presence of elongate spermatids with condensed nuclei. (B) Staining of P18 (18-day old) mouse testes for  $\gamma$ -H2AX. The zoomed views show presence of the XY body in control *Tdrd9*<sup>+/*KI*</sup> testes, but not in the *Tdrd9*<sup>*KI/KI*</sup> mutant. Notice the increased general staining in the mutant germ cells, likely indicating increased DNA damage. (C) TUNEL assay revealing increased dsDNA breaks (green signal) in the *Tdrd9*<sup>*KI/KI*</sup> mutant, suggesting a loss of germ cells by apoptosis after spermatogenic arrest. (D) Immunofluorescence detection of L1ORF1p protein in the *Tdrd9*<sup>*KI/KI*</sup> mutant germ cells, but not in the control *Tdrd9*<sup>+/*KI*</sup> testes. Scale bars are indicated.

**Figure S8. Lack of piRNA biogenesis defect in the *Tdrd9* catalytic-dead mutant. Related to Figure 5.**

MILI and MIWI2 complexes were isolated from P0 animals of the indicated genotypes and examined by deep sequencing. (A) The read length profile of both MILI and MIWI2 piRNAs is similar between *Tdrd9*<sup>+/*KI*</sup>, *Tdrd9*<sup>*KI/KI*</sup> and *Tdrd9*<sup>-/-</sup>, as well as the proportion of primary (1U) and secondary (A10) piRNAs which were defined by the presence of specific nucleotide preferences. (B) Comparison of genome annotation for individual libraries. The loss of TDRD9 or presence of a catalytic-dead mutation in TDRD9 results in accumulation of repeat piRNAs in MILI. (C) Comparison of MIWI2-associated piRNAs (as percentage of the library reads) mapped to individual repeats. While LINE and LTR piRNA counts are increased in *Tdrd9* mutants, the levels of SINE piRNAs are decreased. (D) Comparison of the amount of piRNAs mapped to SINE, LTR and LINE elements. Whereas MIWI2-associated SINE piRNAs are depleted in *Tdrd9*<sup>*KI/KI*</sup> and *Tdrd9*<sup>-/-</sup> mice, MILI-associated LINE and LTR piRNAs are enriched. Thus, although piRNA levels fluctuate, most antisense piRNAs targeting active transposons are still present in the catalytic-dead *Tdrd9* mutant.

**Supplemental Table 1. List of all deep-sequencing libraries created in this study. Related to STAR Methods and Figure 1.**

Data is available from GEO under accession no. GSE95580.

**Supplemental Table 2. List of the top 50 mouse pachytene piRNA clusters used for data analysis. Related to STAR Methods and Figure 4.**

Genomic coordinates of the clusters based on the mm9 mouse assembly is indicated.

A

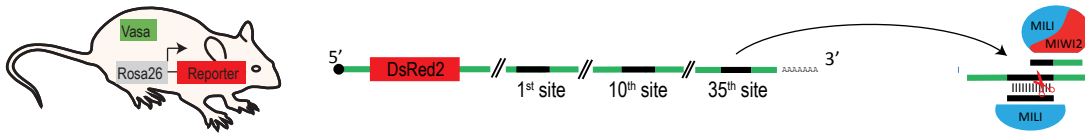

## MILI-associated reporter RNAs

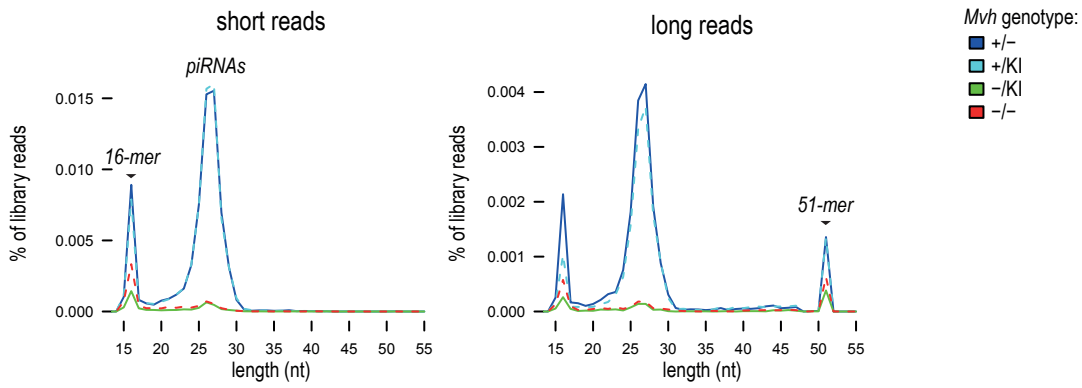

B

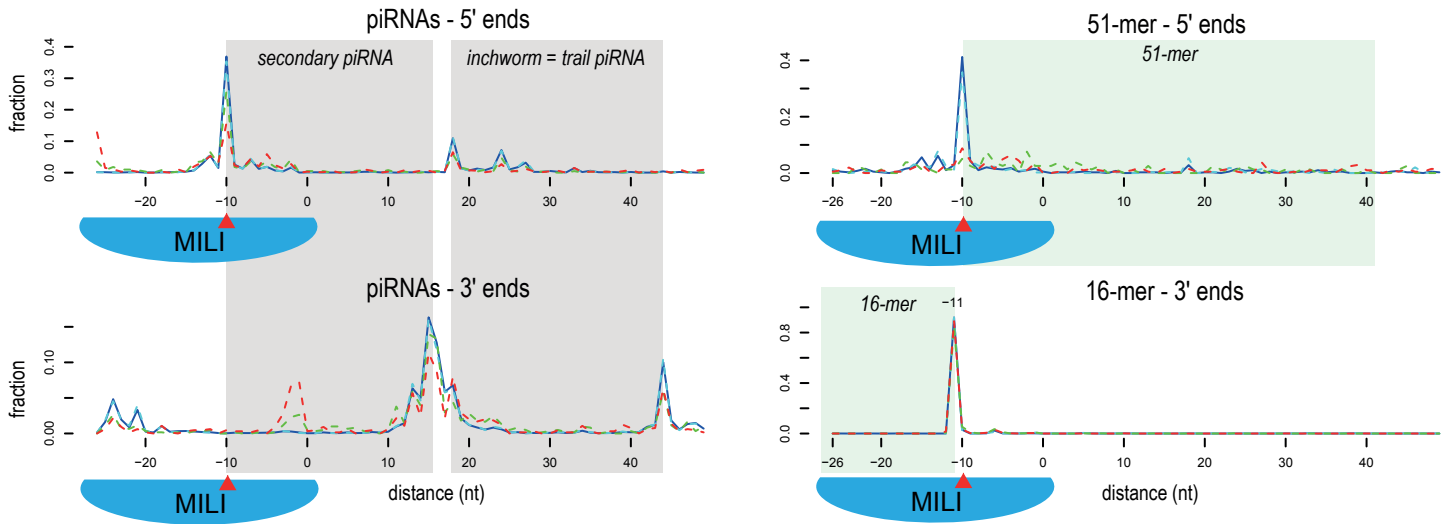

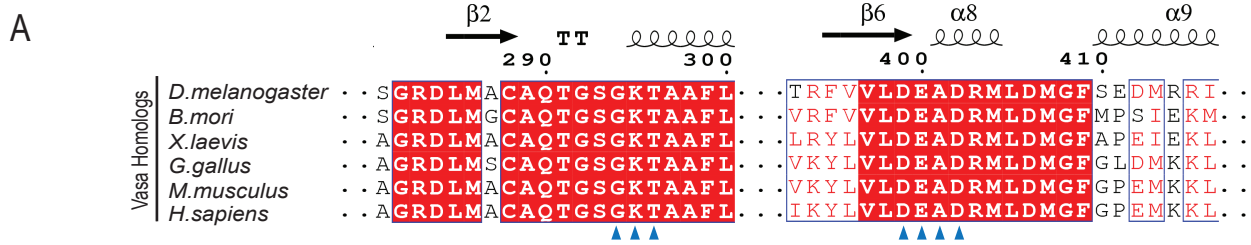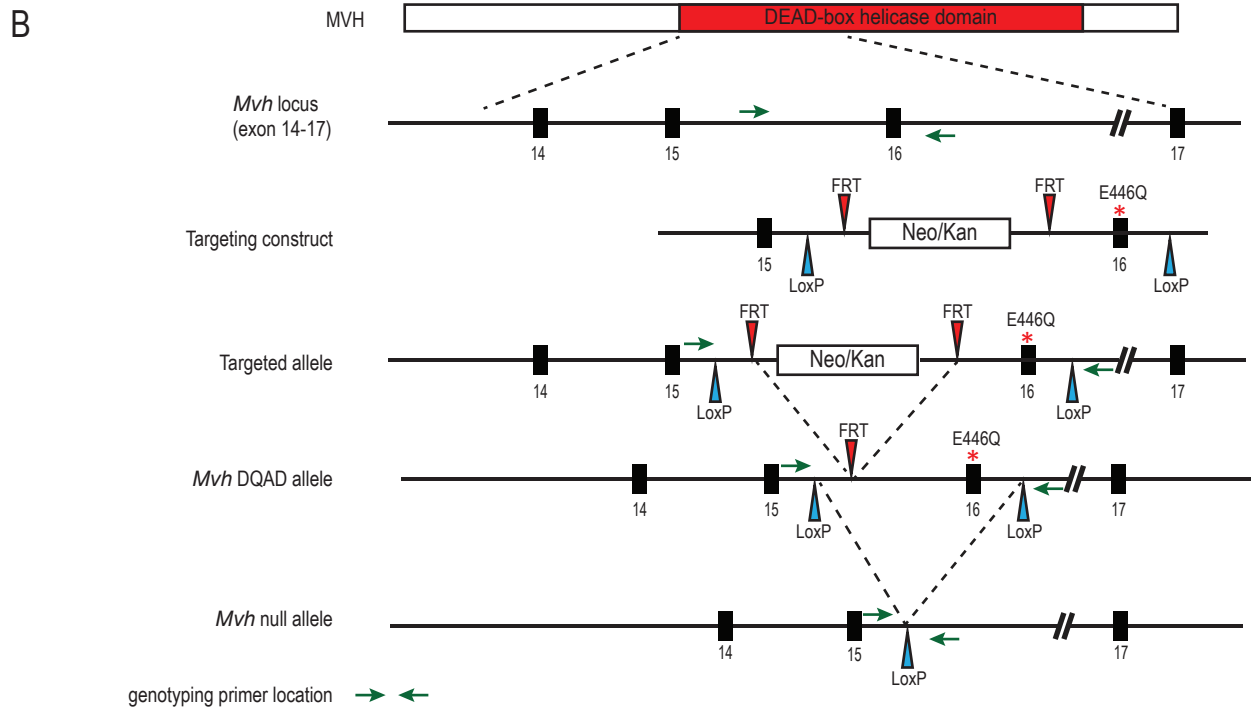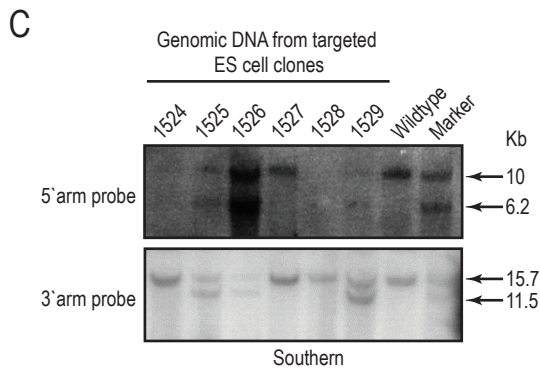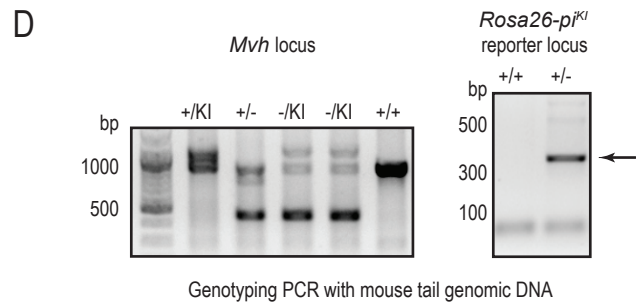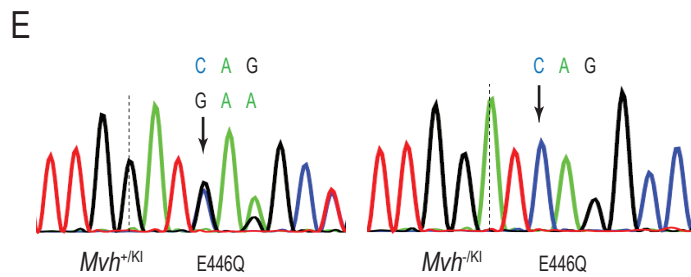

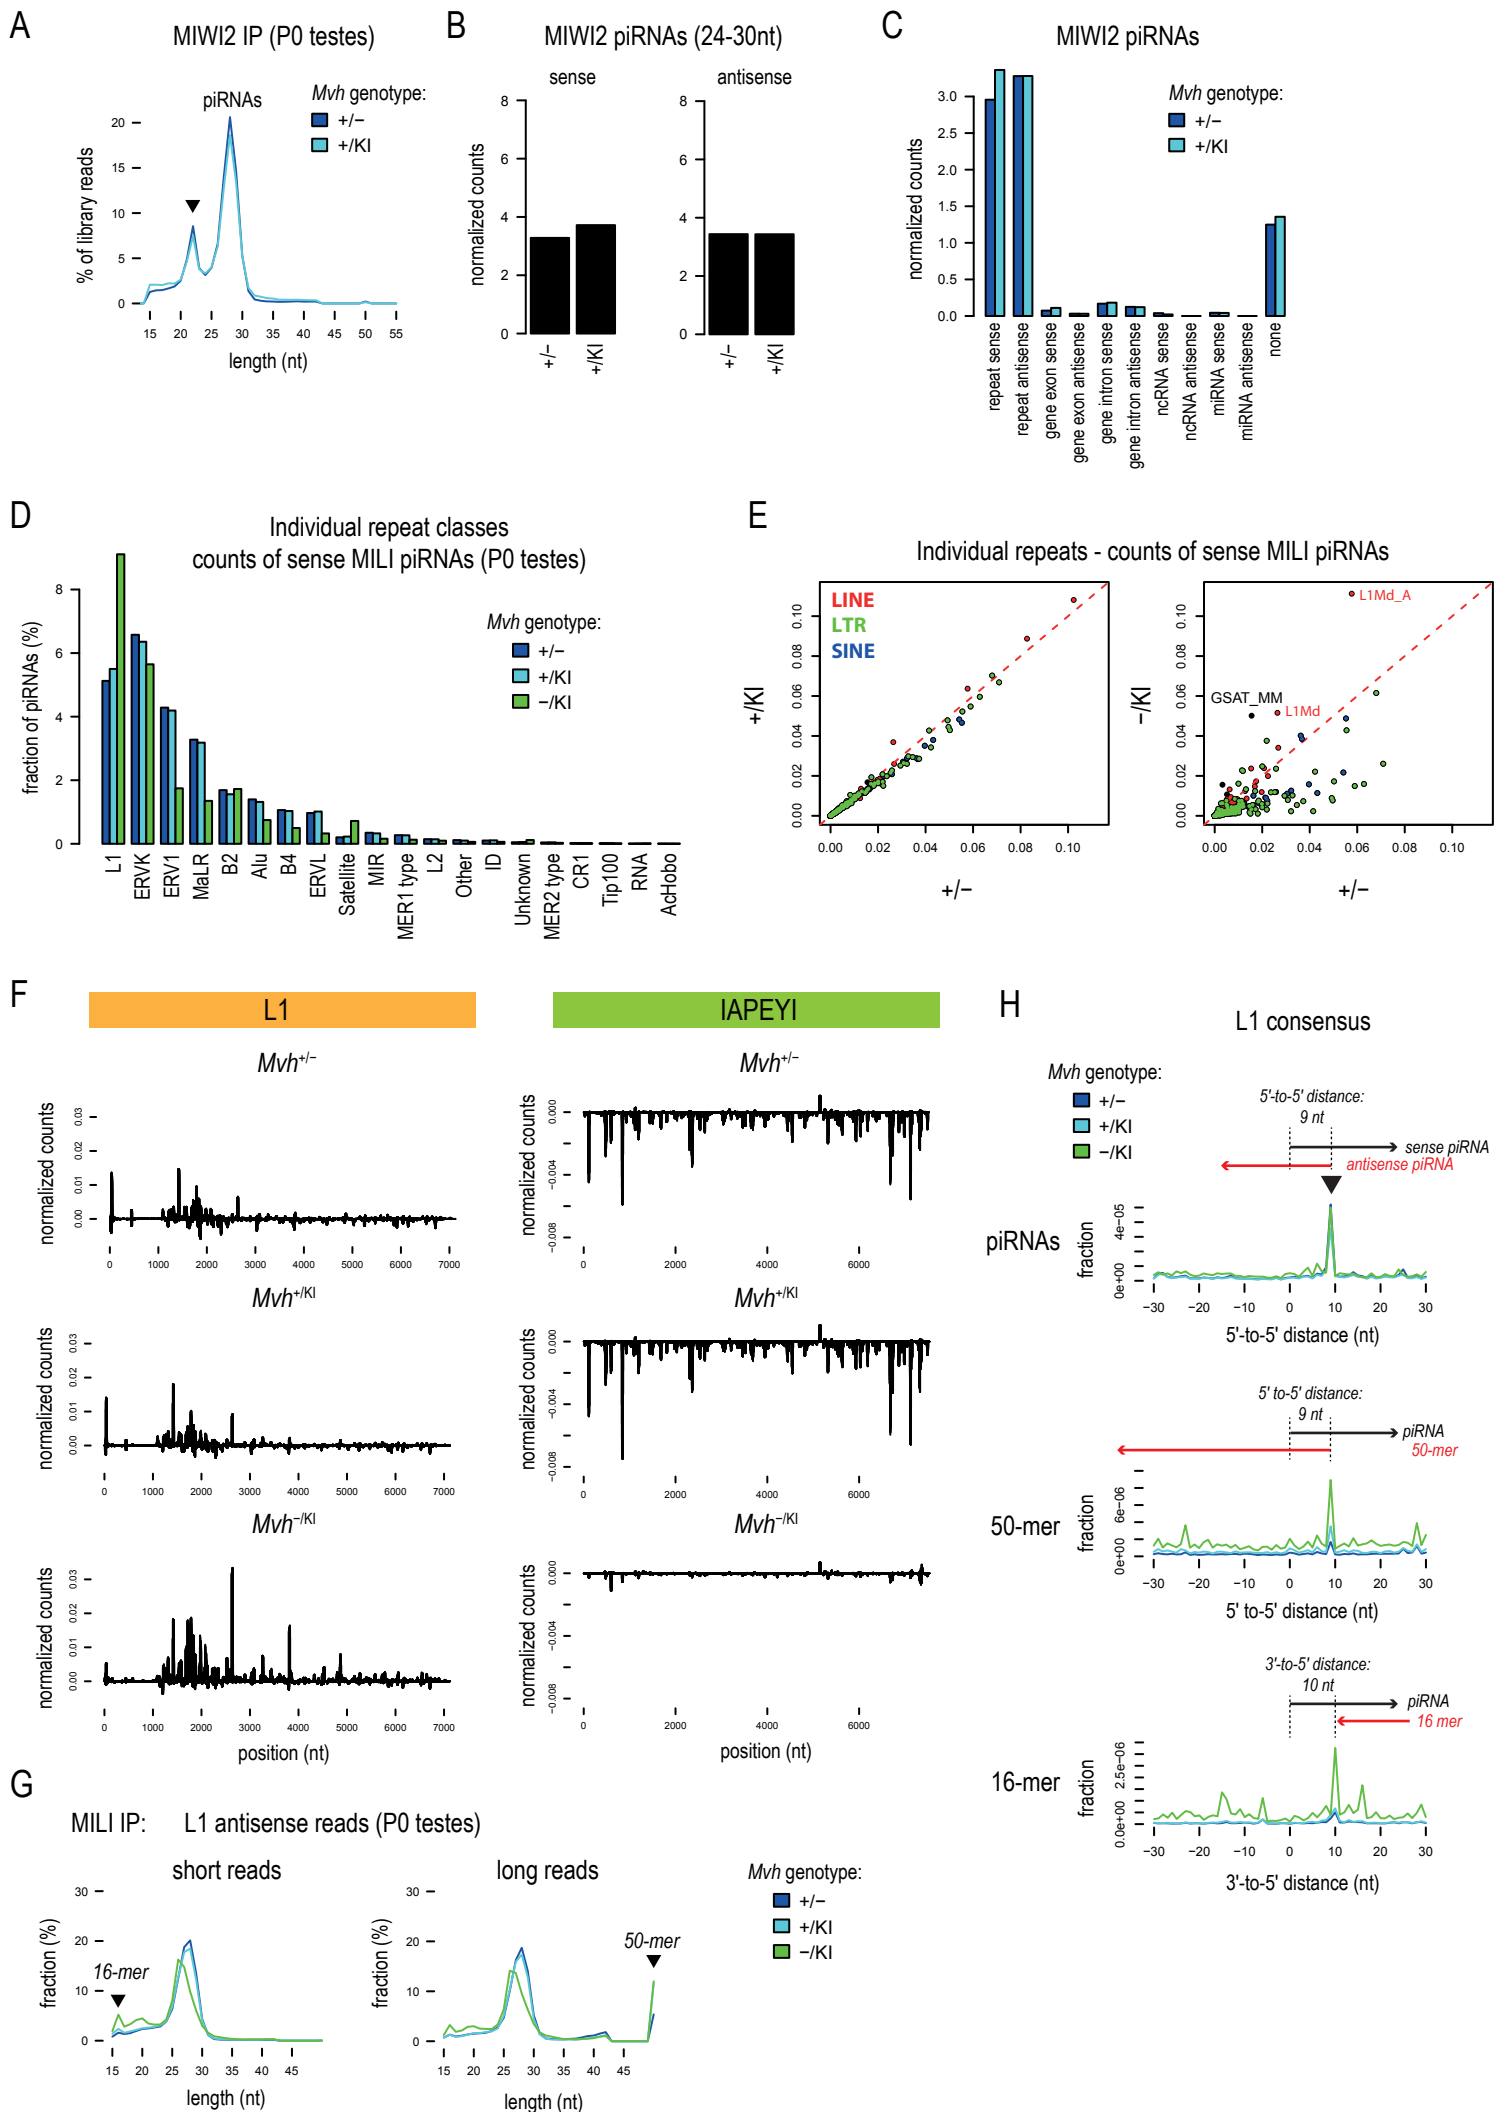

Figure- S3

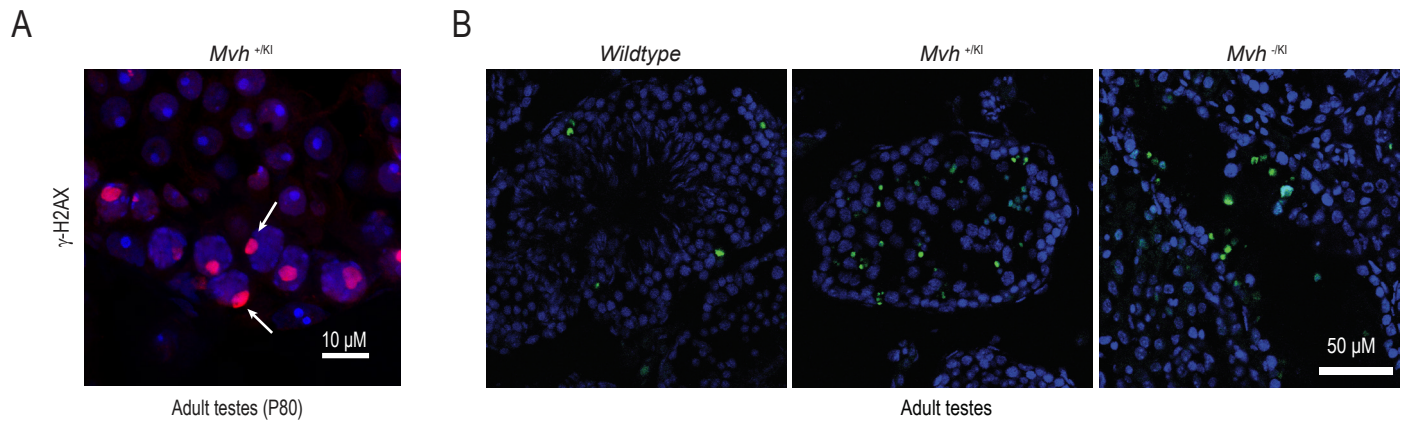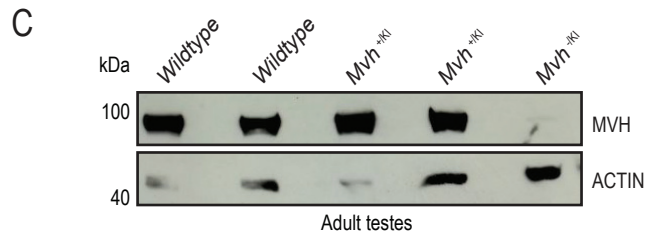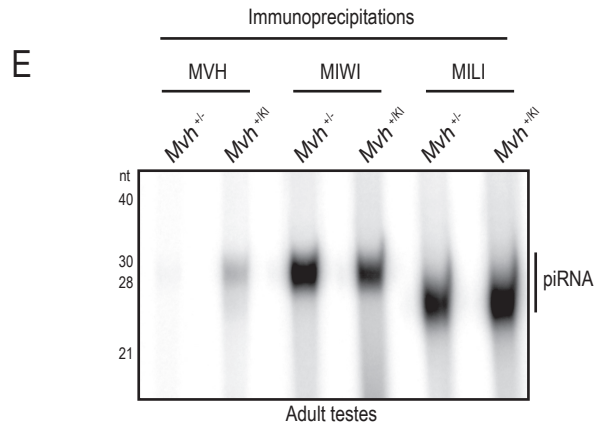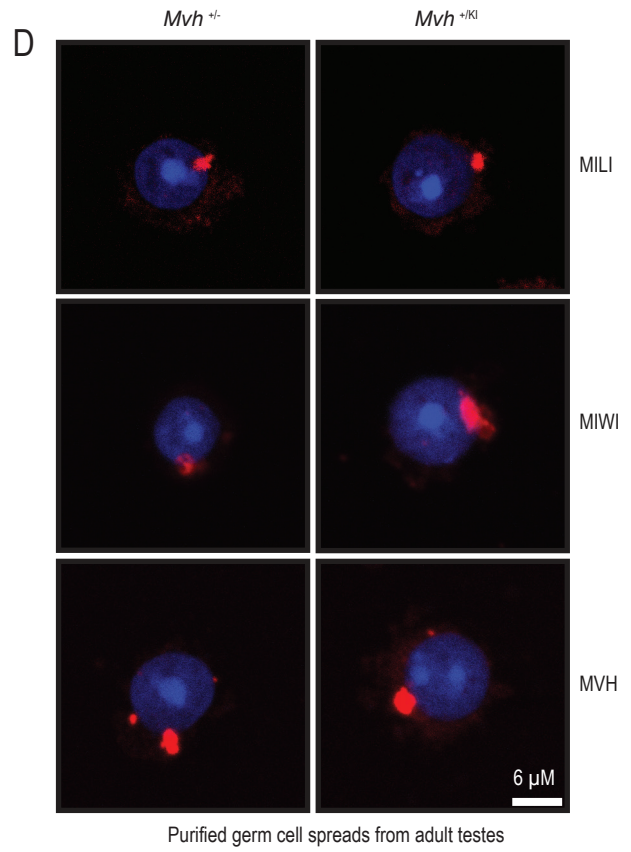

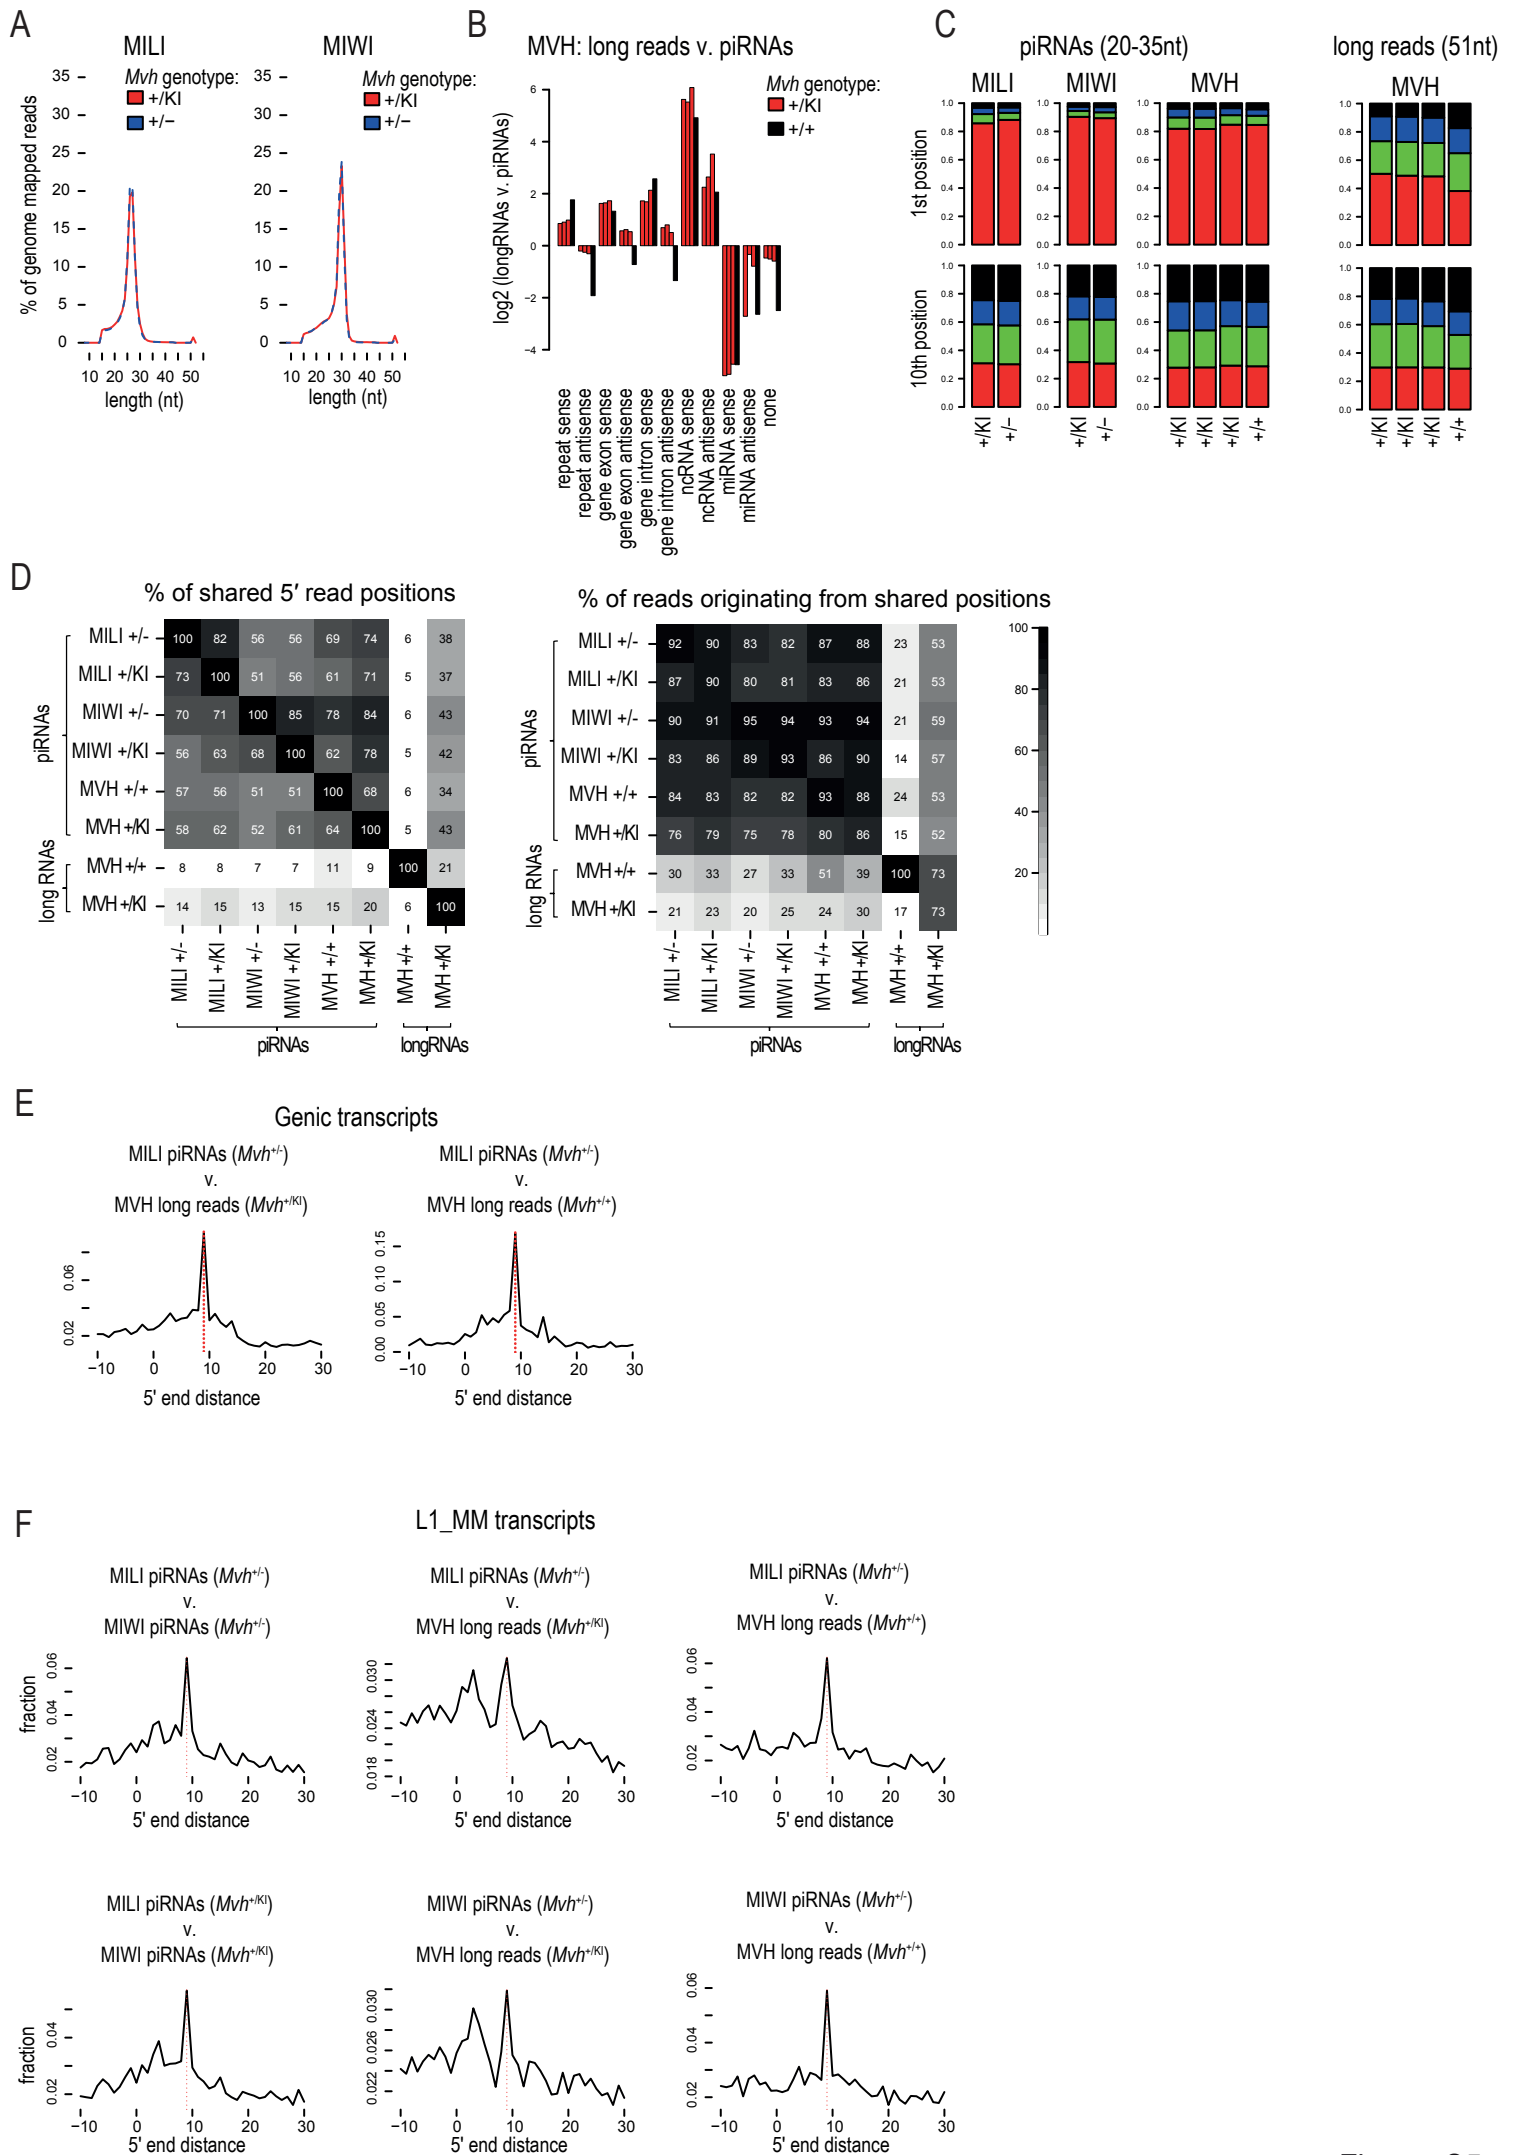

Figure- S5

A

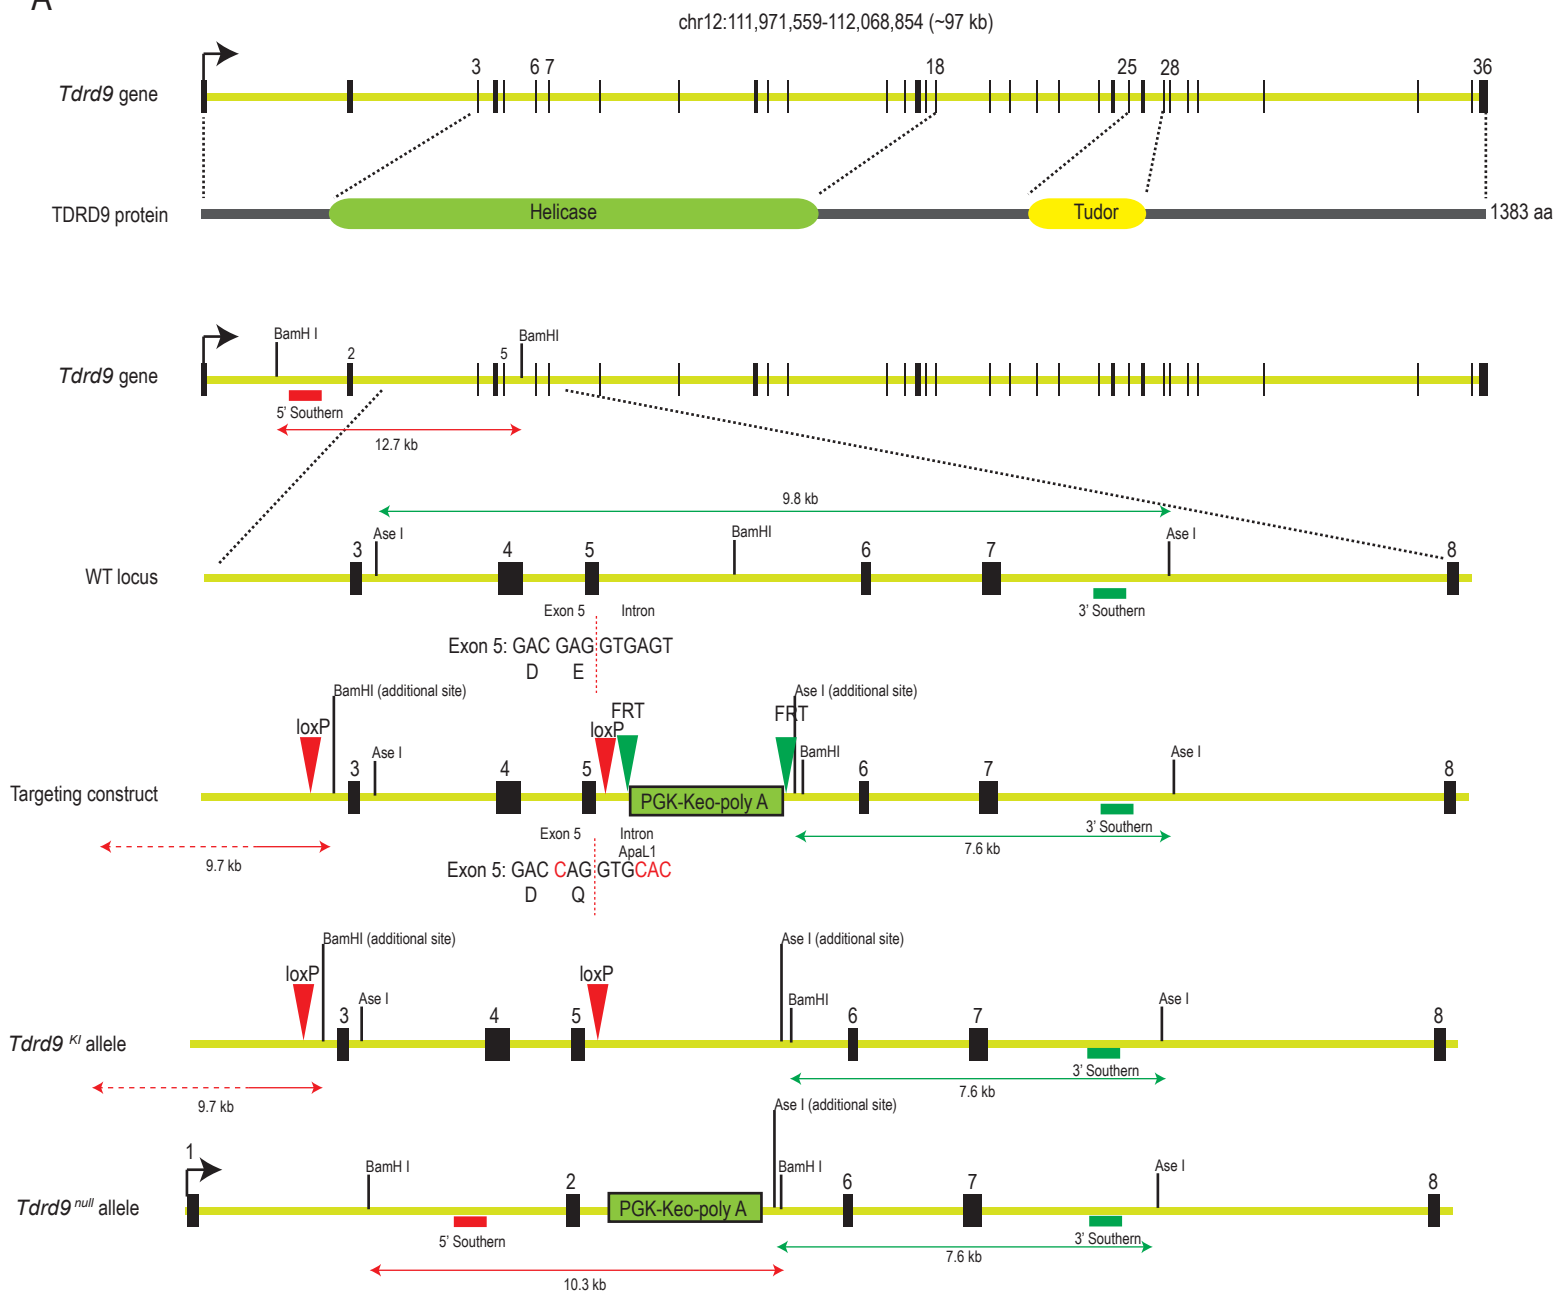

B

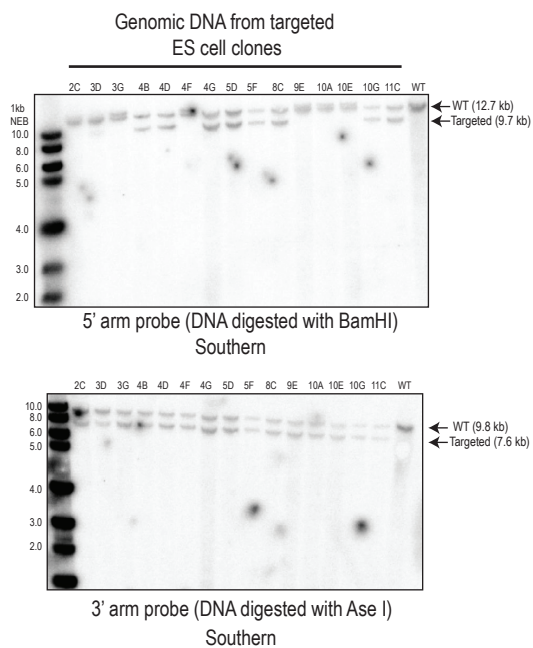

C

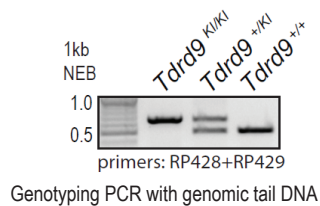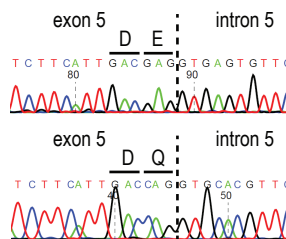



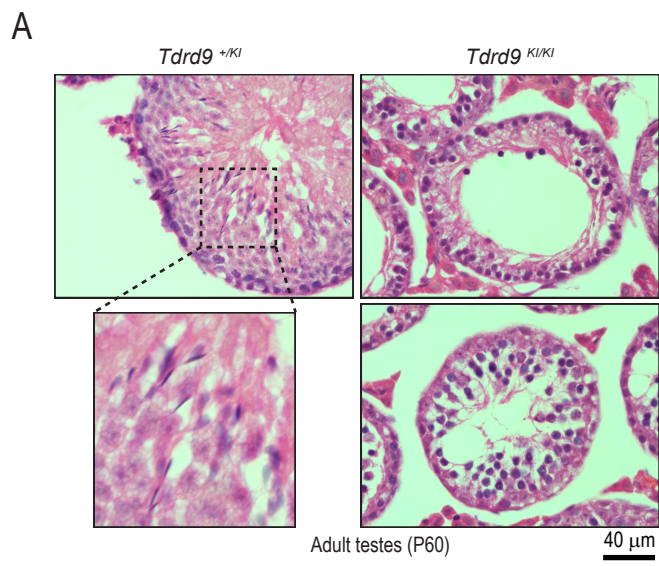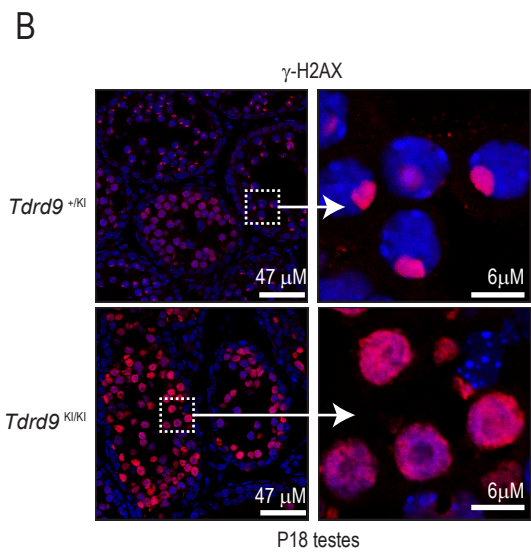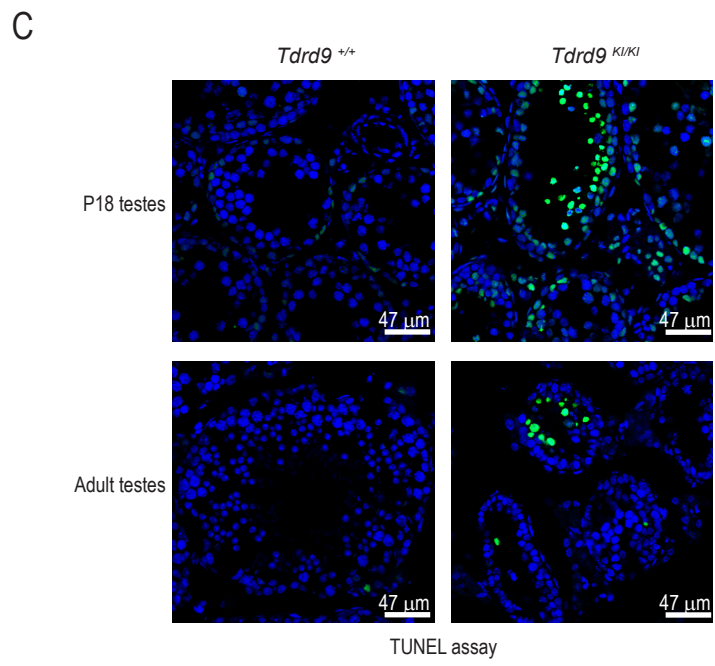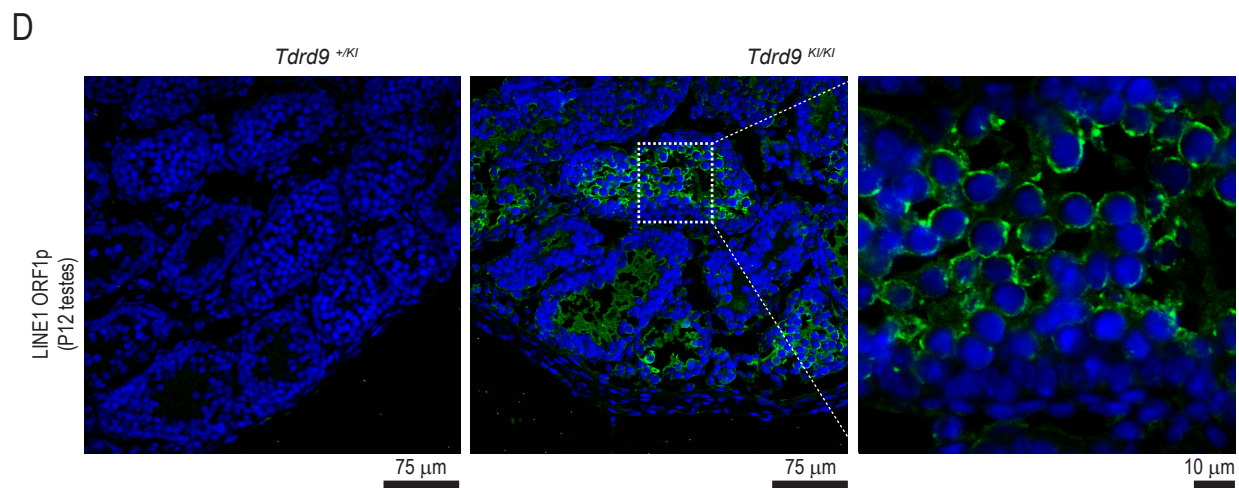

A

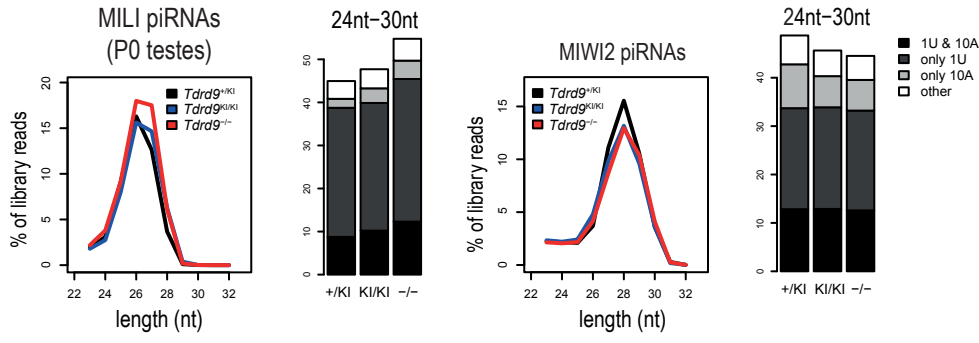

B

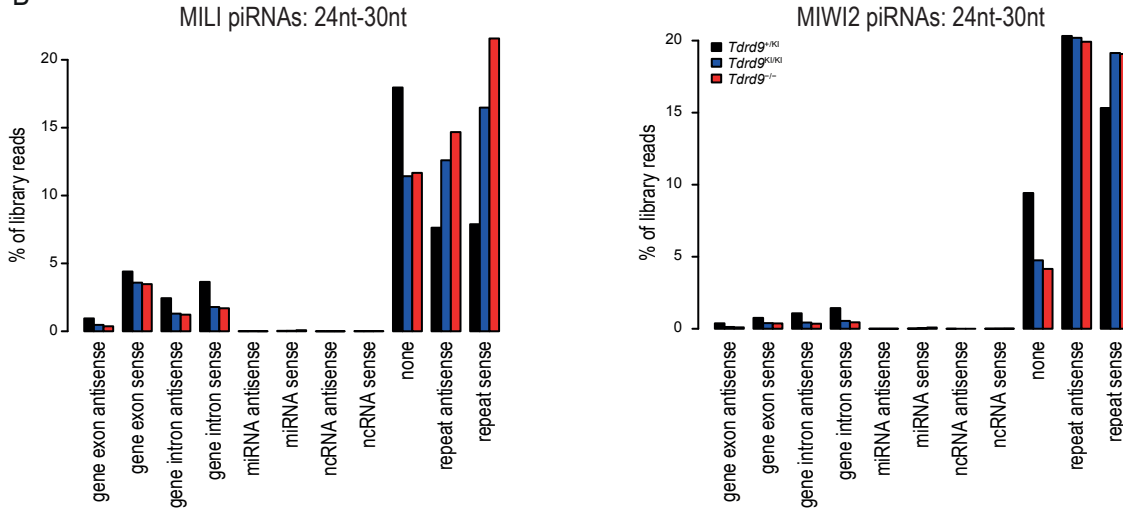

C

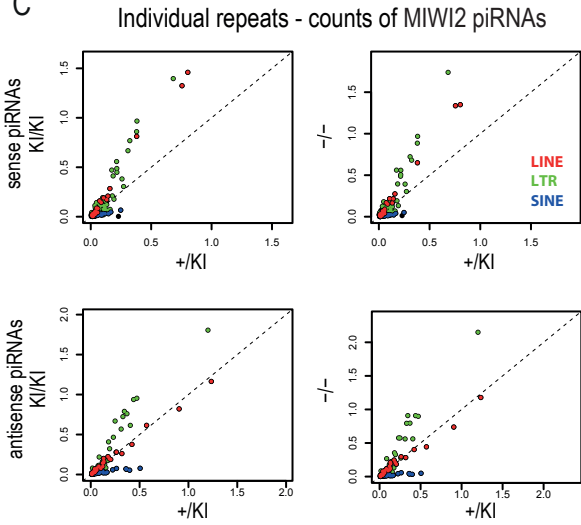

D

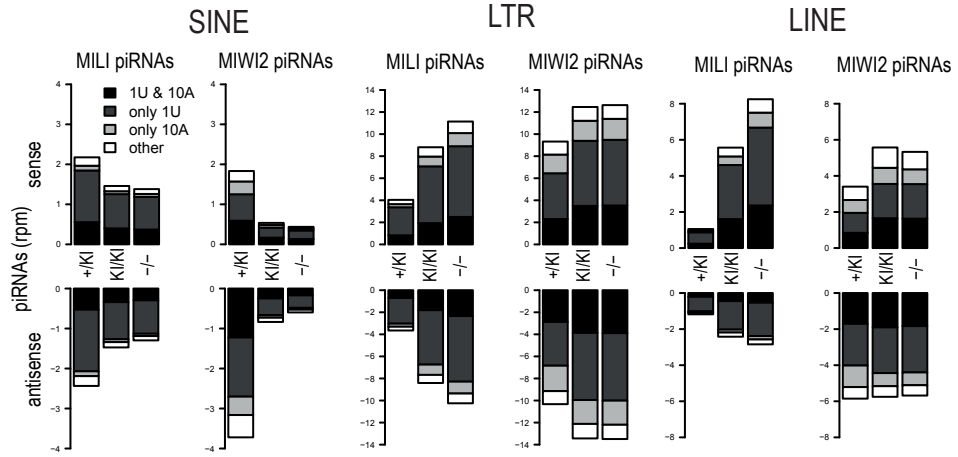

**Supplemental Table S1. List of all deep-sequencing libraries created in this study. Related to STAR Methods and Figure 1.**

| Sample | Description                                        | Mapped to       | Mapped reads |
|--------|----------------------------------------------------|-----------------|--------------|
| RR390  | Rosa26-pi reporter;MVH +/-;P0;MILI IP;piRNAs       | DsRed2 reporter | 29048        |
| RR392  | Rosa26-pi reporter;MVH +/KI;P0;MILI IP;piRNAs      | DsRed2 reporter | 41403        |
| RR393  | Rosa26-pi reporter;MVH -/KI;P0;MILI IP;piRNAs      | DsRed2 reporter | 6044         |
| RR391  | Rosa26-pi reporter;MVH -/-;P0;MILI IP;piRNAs       | DsRed2 reporter | 13799        |
| RR394  | Rosa26-pi reporter;MVH +/-;P0;MILI IP;longer RNAs  | DsRed2 reporter | 7472         |
| RR396  | Rosa26-pi reporter;MVH +/KI;P0;MILI IP;longer RNAs | DsRed2 reporter | 8800         |
| RR397  | Rosa26-pi reporter;MVH -/KI;P0;MILI IP;longer RNAs | DsRed2 reporter | 1030         |
| RR395  | Rosa26-pi reporter;MVH -/-;P0;MILI IP;longer RNAs  | DsRed2 reporter | 3580         |
| RR374  | MVH +/-;P0;MILI IP;piRNAs                          | mm9 genome      | 15626151     |
| RR375  | MVH +/KI;P0;MILI IP;piRNAs                         | mm9 genome      | 13538148     |
| RR376  | MVH -/KI;P0;MILI IP;piRNAs                         | mm9 genome      | 12703627     |
| RR377  | MVH +/-;P0;MIWI2 IP;piRNAs                         | mm9 genome      | 14576415     |
| RR378  | MVH +/KI;P0;MIWI2 IP;piRNAs                        | mm9 genome      | 10718339     |
| RR379  | MVH +/-;P0;MILI IP;longer RNAs                     | mm9 genome      | 15514252     |
| RR380  | MVH +/KI;P0;MILI IP;longer RNAs                    | mm9 genome      | 8363415      |
| RR381  | MVH -/KI;P0;MILI IP;longer RNAs                    | mm9 genome      | 10160004     |
| RR382  | MVH +/-;P0;MIWI2 IP;longer RNAs                    | mm9 genome      | 12118125     |
| RR383  | MVH +/KI;P0;MIWI2 IP;longer RNAs                   | mm9 genome      | 8179838      |
| JW9    | MVH +/KI;adult;MIWI IP;piRNAs                      | mm9 genome      | 29122251     |
| JW10   | MVH +/-;adult;MIWI IP;piRNAs                       | mm9 genome      | 31886830     |
| JW11   | MVH +/KI;adult;MILI IP;piRNAs                      | mm9 genome      | 23647521     |
| JW12   | MVH +/-;adult;MILI IP;piRNAs                       | mm9 genome      | 32987116     |
| JW13   | MVH +/KI;adult;MVH IP;piRNAs;rep1                  | mm9 genome      | 24350164     |
| JW14   | MVH +/KI;adult;MVH IP;piRNAs;rep2                  | mm9 genome      | 23031757     |
| JW15   | MVH +/KI;adult;MVH IP;piRNAs;rep3                  | mm9 genome      | 34031418     |
| JW16   | MVH +/-;adult;MVH IP;piRNAs                        | mm9 genome      | 10861787     |
| JW17   | MVH +/KI;adult;MIWI IP;longer RNAs                 | mm9 genome      | 28616395     |
| JW18   | MVH +/-;adult;MIWI IP;longer RNAs                  | mm9 genome      | 22442466     |
| JW19   | MVH +/KI;adult;MILI IP;longer RNAs                 | mm9 genome      | 13072246     |
| JW20   | MVH +/-;adult;MILI IP;longer RNAs                  | mm9 genome      | 22496088     |
| JW21   | MVH +/KI;adult;MVH IP;longer RNAs;rep1             | mm9 genome      | 20016795     |
| JW22   | MVH +/KI;adult;MVH IP;longer RNAs;rep2             | mm9 genome      | 18634953     |
| JW23   | MVH +/KI;adult;MVH IP;longer RNAs;rep3             | mm9 genome      | 51730274     |
| JW24   | MVH +/-;adult;MVH IP;longer RNAs                   | mm9 genome      | 20429840     |
| RR301  | Tdrd9 +/KI;P0;MILI IP;piRNAs                       | mm9 genome      | 10371936     |
| RR302  | Tdrd9 KI/KI;P0;MILI IP;piRNAs                      | mm9 genome      | 11651344     |
| RR303  | Tdrd9 -/-;P0;MILI IP;piRNAs                        | mm9 genome      | 12228347     |
| RR304  | Tdrd9 +/KI;P0;MIWI2 IP;piRNAs                      | mm9 genome      | 16424774     |
| RR305  | Tdrd9 KI/KI;P0;MIWI2 IP;piRNAs                     | mm9 genome      | 14003398     |
| RR306  | Tdrd9 -/-;P0;MIWI2 IP;piRNAs                       | mm9 genome      | 11133876     |

**Supplemental Table 2. List of the top 50 mouse pachytene piRNA clusters used for data analysis. Related to STAR Methods and Figure 4.**

| #  | chr   | chr_start | chr_end   |
|----|-------|-----------|-----------|
| 1  | chr17 | 27427000  | 27505001  |
| 2  | chr9  | 67538000  | 67615001  |
| 3  | chr2  | 92374000  | 92452001  |
| 4  | chr9  | 54047000  | 54112001  |
| 5  | chr6  | 127726000 | 127801001 |
| 6  | chr12 | 99618000  | 99694001  |
| 7  | chr18 | 67188000  | 67259001  |
| 8  | chr15 | 59078000  | 59136001  |
| 9  | chr7  | 80915000  | 80974001  |
| 10 | chr14 | 24898000  | 24946001  |
| 11 | chr5  | 150591000 | 150636001 |
| 12 | chr7  | 77021000  | 77101001  |
| 13 | chr5  | 113745000 | 113793001 |
| 14 | chr17 | 66536000  | 66587001  |
| 15 | chr7  | 80241000  | 80298001  |
| 16 | chr15 | 74459000  | 74497001  |
| 17 | chr4  | 93942000  | 94000001  |
| 18 | chr10 | 75298000  | 75326001  |
| 19 | chr8  | 112641000 | 112656001 |
| 20 | chr6  | 81843000  | 81854001  |
| 21 | chr10 | 62114000  | 62158001  |
| 22 | chr11 | 103284000 | 103313001 |
| 23 | chr8  | 94712000  | 94724001  |
| 24 | chr5  | 115283000 | 115306001 |
| 25 | chr14 | 20444000  | 20473001  |
| 26 | chr15 | 78468000  | 78502001  |
| 27 | chr4  | 57368000  | 57379001  |
| 28 | chr7  | 132467000 | 132479001 |
| 29 | chr1  | 94887000  | 94895001  |
| 30 | chr7  | 60161000  | 60174001  |
| 31 | chr10 | 85194000  | 85232001  |
| 32 | chr15 | 83183000  | 83197001  |
| 33 | chr10 | 66144000  | 66173001  |
| 34 | chr4  | 61880000  | 61894001  |
| 35 | chr3  | 124102000 | 124126001 |
| 36 | chr6  | 128131000 | 128143001 |
| 37 | chr6  | 85060000  | 85067001  |
| 38 | chr8  | 95933000  | 95949001  |
| 39 | chr10 | 18515000  | 18527001  |
| 40 | chr4  | 135181000 | 135187001 |
| 41 | chr3  | 34765000  | 34779001  |
| 42 | chr6  | 87926000  | 87945001  |
| 43 | chr13 | 53488000  | 53500001  |
| 44 | chr1  | 93450000  | 93457001  |
| 45 | chr14 | 25228000  | 25250001  |
| 46 | chr10 | 86027000  | 86058001  |
| 47 | chr11 | 107854000 | 107861001 |
| 48 | chr5  | 144523000 | 144535001 |
| 49 | chr17 | 66517000  | 66533001  |
| 50 | chr7  | 30917000  | 30926001  |

the positions refer to mm9 coordinates
